# Supplementary material
Source: PubMed Central journal article supplement (PMC4551207)
Supplement: AEM.00281-15_zam999116382so1.pdf [file AEM.00281-15_zam999116382so1.pdf]

## **SUPPLEMENTAL MATERIALS**

**SUPPLEMENTAL FIG 1.** Gross morphology of the intestinal tract, spleen and MLN of ampicillin-treated CBA/J mice infected with *C. jejuni* at 2, 7, and 35 dpi. Mice were inoculated PBS (untreated), a *C. jejuni* wild-type strain, a  $\Delta flgL$  mutant, and the  $\Delta flgL + flgL$  isolate by oral gavage. The colons of animals infected with the *C. jejuni* wild-type strain or the  $\Delta flgL + flgL$  complemented isolate showed signs of edema and apparent stool softening compared to uninfected mice or mice given the  $\Delta flgL$  mutant. MLN = mesenteric lymph nodes.

**SUPPLEMENTAL FIG 2.** Histopathology of the ileocecolic junction of ampicillin-treated CBA/J mice infected with *C. jejuni* at 7 dpi. Microscopy images are shown of longitudinal ileocecolic junction sections of CBA/J mice inoculated by oral gavage with *C. jejuni* wild-type strain or PBS (uninfected) at 7 dpi. Scale bar = 50  $\mu\text{m}$ ; GC = Globular Cell; L = Lymphocyte (mucosal); EC = Epithelial Cell.

**SUPPLEMENTAL TABLE 1.** Murine intestinal isolates recovered from CBA/J mice treated with ampicillin.

**SUPPLEMENTAL TABLE 2.** Alignment of the 16S rRNA gene fragment from *E. faecalis* MEK1 (KLC3001) to the 16S rRNA gene from *E. faecalis* ATCC 29212.

**SUPPLEMENTAL TABLE 3.** Multilocus sequence typing (MLST) of *Enterococcus faecalis* KLC3001.

**SUPPLEMENTAL TABLE 4.** Complete taxon identification of intestinal samples with and without ampicillin treatment.

**SUPPLEMENTAL TABLE 5.** Intestinal taxa (OTUs) common to all animals within a treatment group.

Untreated Wild-type  $\Delta flgL$   $\Delta flgL + flgL$

2 dpi

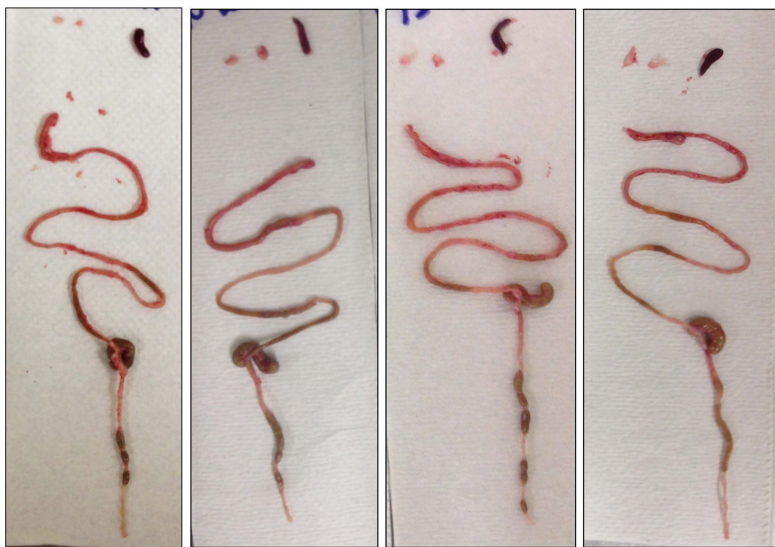

7 dpi

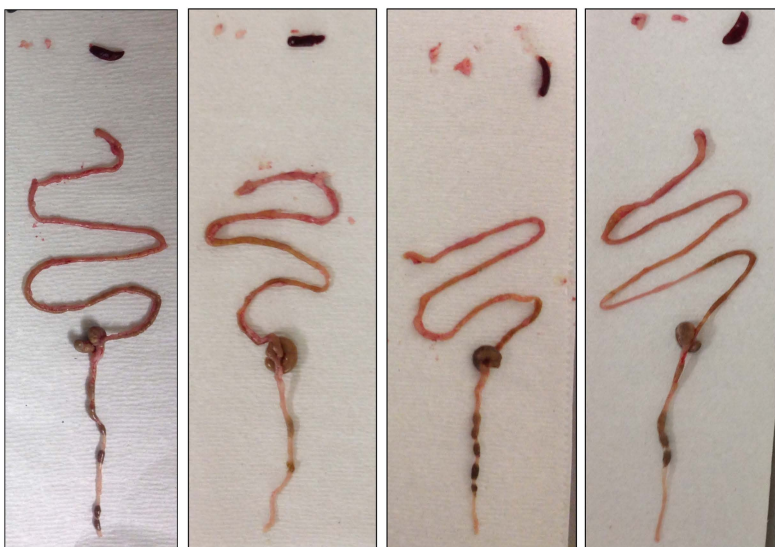

35 dpi

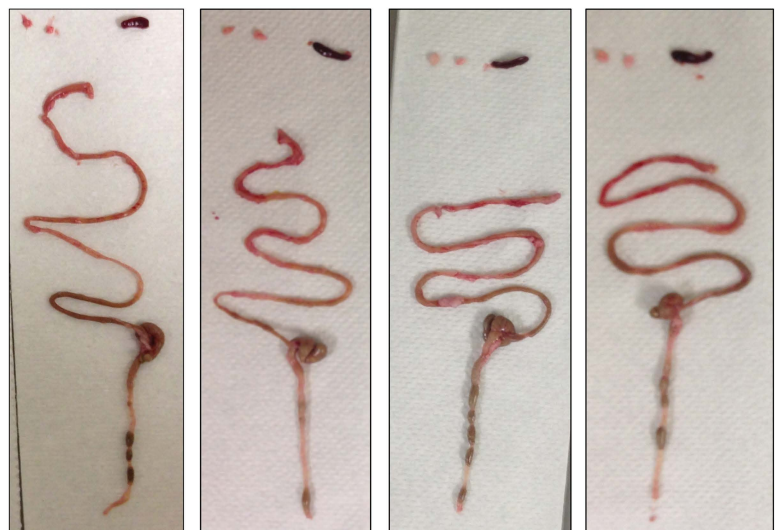

# Uninfected

# Wild-type

7 dpi

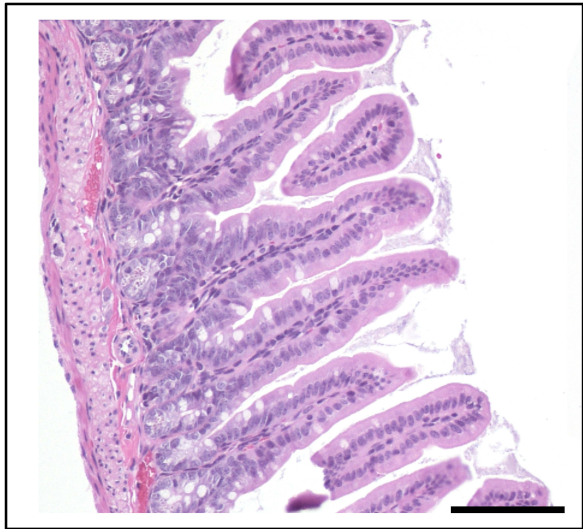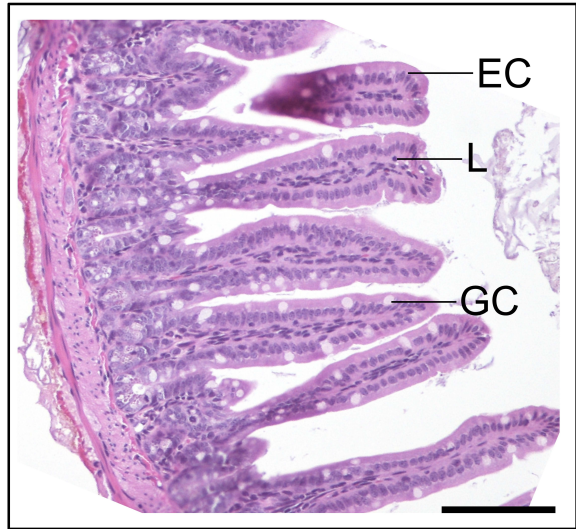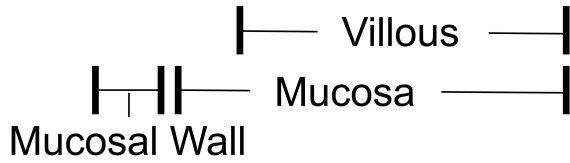

Supplemental Table 1. Murine intestinal isolates recovered from CBA/J mice treated with ampicillin.\*

| <b>Intestinal Isolate</b> | <b>Plate Type</b> | <b>Inhibition</b> |
|---------------------------|-------------------|-------------------|
| MEK1                      | MHB               | Yes               |
| MEK2                      | MHB               | Yes               |
| MEK3                      | MRS               | Yes               |
| MEK4                      | MHB               | Yes               |
| MEK5                      | LB                | Yes               |
| MEK6                      | MRS               | No                |
| MEK7                      | LB                | No                |
| MEK8                      | LB                | No                |
| MEK9                      | MHB               | No                |
| MEK10                     | MHB               | No                |
| MEK11                     | LB                | No                |
| MEK12                     | MHB               | No                |
| MEK13                     | MHB               | No                |

\*Isolates recovered from 5 mice ( $n = 5$ )

Supplemental Table 2. Alignment of the 16S rRNA gene fragment from *E. faecalis* MEK1 (KLC3001) to the 16S rRNA gene from *E. faecalis* ATCC 29212.\*

|            |        |                                                               |        |
|------------|--------|---------------------------------------------------------------|--------|
| MEK1       | 1      | CTGGCGGCGTGCCTAATACATGCAAGTCGAACGCTTCTTTCCCTCCCGAGTGCTTGCACTC | 60     |
| ATCC 29212 | 108195 | CTGGCGGCGTGCCTAATACATGCAAGTCGAACGCTTCTTTCCCTCCCGAGTGCTTGCACTC | 108254 |
| MEK1       | 61     | AATTGGAAGAGGAGTGGCGGACGGGTGAGTAACACGTGGGTAACTACCCATCAGAGGG    | 120    |
| ATCC 29212 | 108255 | AATTGGAAGAGGAGTGGCGGACGGGTGAGTAACACGTGGGTAACTACCCATCAGAGGG    | 108314 |
| MEK1       | 121    | GGATAACACTTGGAACAGGTGCTAATACCGCATAACAGTTTATGCCGCATGGCATAAGA   | 180    |
| ATCC 29212 | 108315 | GGATAACACTTGGAACAGGTGCTAATACCGCATAACAGTTTATGCCGCATGGCATAAGA   | 108374 |
| MEK1       | 181    | GTGAAAGGCGCTTTCGGGTGTCGCTGATGGATGGACCCGCGGTGCATTAGCTAGTTGGTG  | 240    |
| ATCC 29212 | 108375 | GTGAAAGGCGCTTTCGGGTGTCGCTGATGGATGGACCCGCGGTGCATTAGCTAGTTGGTG  | 108434 |
| MEK1       | 241    | AGGTAACGGCTCACCAAGGCCACGATGCATAGCCGACCTGAGAGGGTGATCGGCCACACT  | 300    |
| ATCC 29212 | 108435 | AGGTAACGGCTCACCAAGGCCACGATGCATAGCCGACCTGAGAGGGTGATCGGCCACACT  | 108494 |
| MEK1       | 301    | GGGACTGAGACACGGCCAGACTCCTACGGGAGGCAGCAGTAGGGAATCTTCGGCAATGG   | 360    |
| ATCC 29212 | 108495 | GGGACTGAGACACGGCCAGACTCCTACGGGAGGCAGCAGTAGGGAATCTTCGGCAATGG   | 108554 |
| MEK1       | 361    | ACGAAAGTCTGACCGAGCAACGCCGCTGAGTGAAGAAGGTTTTCGGATCGTAAAACCT    | 420    |
| ATCC 29212 | 108555 | ACGAAAGTCTGACCGAGCAACGCCGCTGAGTGAAGAAGGTTTTCGGATCGTAAAACCT    | 108614 |
| MEK1       | 421    | GTGTGTAGAGAAGAACAAGGACGTTAGTAACTGAACGTCCCTGACGGTATCTAACCAGA   | 480    |
| ATCC 29212 | 108615 | GTGTGTAGAGAAGAACAAGGACGTTAGTAACTGAACGTCCCTGACGGTATCTAACCAGA   | 108674 |
| MEK1       | 481    | AAGCCACGGCTAACTACGAGCCAGCAGCCGCGTAATACGTAGGTGGCAAGCGTTATCCG   | 540    |
| ATCC 29212 | 108675 | AAGCCACGGCTAACTACGAGCCAGCAGCCGCGTAATACGTAGGTGGCAAGCGTTATCCG   | 108734 |
| MEK1       | 541    | GAATTATGGGCGTAAAGCGAGCGCAGCGGTTTCTTAAGTCTGATGTGAAAGCCCCGG     | 600    |
| ATCC 29212 | 108735 | GAATTATGGGCGTAAAGCGAGCGCAGCGGTTTCTTAAGTCTGATGTGAAAGCCCCGG     | 108794 |
| MEK1       | 601    | CTCAACCGGGAGGGTCAATTGGAACCTGGGAGACTTGAGTGCAGAAGAGGAGAGTGGAAAT | 660    |
| ATCC 29212 | 108795 | CTCAACCGGGAGGGTCAATTGGAACCTGGGAGACTTGAGTGCAGAAGAGGAGAGTGGAAAT | 108854 |
| MEK1       | 661    | TCCATGTGTAGCGGTGAAATGCGTAGATATATGGAGGAACACCAGTGGCGAAGGCGGCTC  | 720    |
| ATCC 29212 | 108855 | TCCATGTGTAGCGGTGAAATGCGTAGATATATGGAGGAACACCAGTGGCGAAGGCGGCTC  | 108914 |
| MEK1       | 721    | TCTGGTCTGTAACCTGACGCTGAGGCTCGAAAGCGTGGGGAGCAAACAGGATTAGATACCC | 780    |
| ATCC 29212 | 108915 | TCTGGTCTGTAACCTGACGCTGAGGCTCGAAAGCGTGGGGAGCAAACAGGATTAGATACCC | 108974 |
| MEK1       | 781    | TGGTAGTCCACGCCGTAACGATGAGTGCTAAGTGTGGAGGGTTTCCGCCCTTCAGTGC    | 840    |
| ATCC 29212 | 108975 | TGGTAGTCCACGCCGTAACGATGAGTGCTAAGTGTGGAGGGTTTCCGCCCTTCAGTGC    | 109034 |
| MEK1       | 841    | TGCAGCAAACGCATTAAGCACTCCGCCGTTGGGAGTACGACCGAAGGTTGAAACTCAAAG  | 900    |
| ATCC 29212 | 109035 | TGCAGCAAACGCATTAAGCACTCCGCCGTTGGGAGTACGACCGAAGGTTGAAACTCAAAG  | 109094 |
| MEK1       | 901    | GAATTGACGGGGCCCGCACAAGCGGTGGAGCATGTGTTTGTATTCGAAGCAACGCGAAG   | 960    |
| ATCC 29212 | 109095 | GAATTGACGGGGCCCGCACAAGCGGTGGAGCATGTGTTTGTATTCGAAGCAACGCGAAG   | 109154 |
| MEK1       | 961    | AACCTTACCAGGTCTTGACATCCTTTGACCACCTAGAGATAGAGCTTTCCTTCGGGGA    | 1020   |
| ATCC 29212 | 109155 | AACCTTACCAGGTCTTGACATCCTTTGACCACCTAGAGATAGAGCTTTCCTTCGGGGA    | 109214 |



Supplemental Table 3. Multilocus sequence typing (MLST) of *Enterococcus faecalis* KLC3001.

| <b>Name</b> | <b>Primer Sequence</b>         | <b>Sequence Type: 55</b> |
|-------------|--------------------------------|--------------------------|
| gdh-1       | 5'-GGCGCACTAAAAGATATGGT-3'     | 3                        |
| gdh-2       | 5'-CCAAGATTGGGCAACTTCGTCCCA-3' |                          |
| gyd-1       | 5'-CAAAGTCTTAGCTCCAATGGC-3'    | 7                        |
| gyd-2       | 5'-CATTTTCGTTGTCATACCAAGC-3'   |                          |
| pstS-1      | 5'-CGGAACAGGACTTTTCGC-3'       | 23                       |
| pstS-2      | 5'-ATTTACATCACGTTCTACTTGC-3'   |                          |
| gki-1       | 5'-GATTTTGTGGGAATTGGTATGG-3'   | 1                        |
| gki-2       | 5'-ACCATTAAAGCAAAATGATCGC-3'   |                          |
| aroE-1      | 5'-TGGAAAACCTTACGGAGACAGC-3'   | 9                        |
| aroE-2      | 5'-GTCCTGTCCATTGTTCAAAGC-3'    |                          |
| xpt-1       | 5'-AAAATGATGGCCGTGTATTAGG-3'   | 16                       |
| xpt-2       | 5'-AACGTCACCGTTCCTTCACTTA-3'   |                          |
| yqiL-1      | 5'-CAGCTTAAGTCAAGTAAGTGCCG-3'  | 7                        |
| yqiL-2      | 5'-GAATATCCCTTCTGCTTGTGCT-3'   |                          |

**Supplemental Table 4.** Complete taxon identification of intestinal samples with and without ampicillin treatment

| Taxon                                                                                                          | +Amp   | -Amp   |
|----------------------------------------------------------------------------------------------------------------|--------|--------|
| Bacteria;Actinobacteria;Actinobacteria;Coriobacteriales;Coriobacteriaceae;Asaccharobacter                      | 0.00%  | 0.00%  |
| Bacteria;Bacteroidetes;Bacteroidia;Bacteroidales;Bacteroidaceae;Bacteroides                                    | 0.00%  | 0.00%  |
| Bacteria;Bacteroidetes;Bacteroidia;Bacteroidales;Porphyromonadaceae;Barnesiella                                | 71.90% | 52.79% |
| Bacteria;Bacteroidetes;Bacteroidia;Bacteroidales;Porphyromonadaceae;Tannerella                                 | 0.00%  | 0.00%  |
| Bacteria;Bacteroidetes;Bacteroidia;Bacteroidales;Prevotellaceae;Prevotella                                     | 0.00%  | 0.00%  |
| Bacteria;Bacteroidetes;Flavobacteria;Flavobacteriales;Flavobacteriaceae;Elizabethkingia                        | 0.00%  | 0.00%  |
| Bacteria;Bacteroidetes;Flavobacteria;Flavobacteriales;Flavobacteriaceae;Flavobacterium                         | 0.23%  | 0.00%  |
| Bacteria;Bacteroidetes;Sphingobacteria;Sphingobacteriales;Sphingobacteriaceae;Pedobacter                       | 0.00%  | 0.00%  |
| Bacteria;Cyanobacteria_Chloroplast;Chloroplast;Chloroplast_order_incertae_sedis;Chloroplast;Streptophyta       | 1.93%  | 0.01%  |
| Bacteria;Firmicutes;Bacilli;Bacillales;Staphylococcaceae;Staphylococcus                                        | 0.01%  | 0.00%  |
| Bacteria;Firmicutes;Bacilli;Lactobacillales;Enterococcaceae;Enterococcus                                       | 12.46% | 0.04%  |
| Bacteria;Firmicutes;Bacilli;Lactobacillales;Enterococcaceae;Melissococcus                                      | 0.00%  | 0.00%  |
| Bacteria;Firmicutes;Bacilli;Lactobacillales;Lactobacillaceae;Lactobacillus                                     | 5.40%  | 0.78%  |
| Bacteria;Firmicutes;Bacilli;Lactobacillales;Streptococcaceae;Lactococcus                                       | 0.00%  | 0.00%  |
| Bacteria;Firmicutes;Bacilli;Lactobacillales;Streptococcaceae;Streptococcus                                     | 0.04%  | 0.00%  |
| Bacteria;Firmicutes;Clostridia;Clostridiales;Clostridiaceae_1;Clostridium_sensu_stricto                        | 0.00%  | 0.00%  |
| Bacteria;Firmicutes;Clostridia;Clostridiales;Clostridiales_Incertae_Sedis_XII;Acidaminobacter                  | 0.16%  | 0.00%  |
| Bacteria;Firmicutes;Clostridia;Clostridiales;Eubacteriaceae;Eubacterium                                        | 0.03%  | 0.29%  |
| Bacteria;Firmicutes;Clostridia;Clostridiales;Gracilibacteraceae;Gracilibacter                                  | 0.39%  | 0.51%  |
| Bacteria;Firmicutes;Clostridia;Clostridiales;Lachnospiraceae;Acetitomaculum                                    | 0.00%  | 0.07%  |
| Bacteria;Firmicutes;Clostridia;Clostridiales;Lachnospiraceae;Anaerostipes                                      | 0.04%  | 0.15%  |
| Bacteria;Firmicutes;Clostridia;Clostridiales;Lachnospiraceae;Blautia                                           | 0.00%  | 0.54%  |
| Bacteria;Firmicutes;Clostridia;Clostridiales;Lachnospiraceae;Butyrivibrio                                      | 0.01%  | 0.26%  |
| Bacteria;Firmicutes;Clostridia;Clostridiales;Lachnospiraceae;Clostridium_XIVa                                  | 1.27%  | 11.94% |
| Bacteria;Firmicutes;Clostridia;Clostridiales;Lachnospiraceae;Clostridium_XIVb                                  | 0.02%  | 0.71%  |
| Bacteria;Firmicutes;Clostridia;Clostridiales;Lachnospiraceae;Coprococcus                                       | 0.18%  | 4.71%  |
| Bacteria;Firmicutes;Clostridia;Clostridiales;Lachnospiraceae;Dorea                                             | 0.00%  | 0.02%  |
| Bacteria;Firmicutes;Clostridia;Clostridiales;Lachnospiraceae;Hespella                                          | 0.00%  | 0.02%  |
| Bacteria;Firmicutes;Clostridia;Clostridiales;Lachnospiraceae;Johnsonella                                       | 0.01%  | 0.24%  |
| Bacteria;Firmicutes;Clostridia;Clostridiales;Lachnospiraceae;Lachnospiraceae_incertae_sedis                    | 1.12%  | 5.78%  |
| Bacteria;Firmicutes;Clostridia;Clostridiales;Lachnospiraceae;Lactonifactor                                     | 0.00%  | 0.00%  |
| Bacteria;Firmicutes;Clostridia;Clostridiales;Lachnospiraceae;Marvinbryantia                                    | 0.06%  | 0.53%  |
| Bacteria;Firmicutes;Clostridia;Clostridiales;Lachnospiraceae;Moryella                                          | 0.00%  | 0.33%  |
| Bacteria;Firmicutes;Clostridia;Clostridiales;Lachnospiraceae;Oribacterium                                      | 0.00%  | 0.23%  |
| Bacteria;Firmicutes;Clostridia;Clostridiales;Lachnospiraceae;Parasporobacterium                                | 0.00%  | 0.00%  |
| Bacteria;Firmicutes;Clostridia;Clostridiales;Lachnospiraceae;Robinsoniella                                     | 0.00%  | 0.16%  |
| Bacteria;Firmicutes;Clostridia;Clostridiales;Lachnospiraceae;Roseburia                                         | 0.00%  | 0.14%  |
| Bacteria;Firmicutes;Clostridia;Clostridiales;Lachnospiraceae;Shuttleworthia                                    | 0.00%  | 0.00%  |
| Bacteria;Firmicutes;Clostridia;Clostridiales;Lachnospiraceae;Syntrophococcus                                   | 0.12%  | 5.02%  |
| Bacteria;Firmicutes;Clostridia;Clostridiales;Peptostreptococcaceae;Clostridium_XI                              | 0.00%  | 0.00%  |
| Bacteria;Firmicutes;Clostridia;Clostridiales;Peptostreptococcaceae;Peptostreptococcus                          | 0.00%  | 0.00%  |
| Bacteria;Firmicutes;Clostridia;Clostridiales;Ruminococcaceae;Acetanaerobacterium                               | 0.00%  | 0.24%  |
| Bacteria;Firmicutes;Clostridia;Clostridiales;Ruminococcaceae;Acetivibrio                                       | 0.30%  | 2.64%  |
| Bacteria;Firmicutes;Clostridia;Clostridiales;Ruminococcaceae;Anaerofilum                                       | 0.00%  | 0.00%  |
| Bacteria;Firmicutes;Clostridia;Clostridiales;Ruminococcaceae;Anaerotruncus                                     | 0.02%  | 0.46%  |
| Bacteria;Firmicutes;Clostridia;Clostridiales;Ruminococcaceae;Butyrivibrio                                      | 0.00%  | 0.00%  |
| Bacteria;Firmicutes;Clostridia;Clostridiales;Ruminococcaceae;Clostridium_IV                                    | 0.37%  | 3.10%  |
| Bacteria;Firmicutes;Clostridia;Clostridiales;Ruminococcaceae;Ethanoflaxigenens                                 | 0.00%  | 0.00%  |
| Bacteria;Firmicutes;Clostridia;Clostridiales;Ruminococcaceae;Flavonifractor                                    | 1.31%  | 1.61%  |
| Bacteria;Firmicutes;Clostridia;Clostridiales;Ruminococcaceae;Hydrogenoanaerobacterium                          | 0.07%  | 0.96%  |
| Bacteria;Firmicutes;Clostridia;Clostridiales;Ruminococcaceae;Oscillibacter                                     | 0.45%  | 3.39%  |
| Bacteria;Firmicutes;Clostridia;Clostridiales;Ruminococcaceae;Papillibacter                                     | 0.00%  | 0.02%  |
| Bacteria;Firmicutes;Clostridia;Clostridiales;Ruminococcaceae;Pseudoflavonifractor                              | 0.37%  | 1.49%  |
| Bacteria;Firmicutes;Clostridia;Clostridiales;Ruminococcaceae;Ruminococcus                                      | 0.00%  | 0.00%  |
| Bacteria;Firmicutes;Clostridia;Clostridiales;Ruminococcaceae;Saccharofermentans                                | 0.04%  | 0.27%  |
| Bacteria;Firmicutes;Clostridia;Clostridiales;Ruminococcaceae;Subdoligranulum                                   | 0.00%  | 0.00%  |
| Bacteria;Firmicutes;Erysipelotrichia;Erysipelotrichales;Erysipelotrichaceae;Bulleidia                          | 0.00%  | 0.00%  |
| Bacteria;Firmicutes;Erysipelotrichia;Erysipelotrichales;Erysipelotrichaceae;Clostridium_XVIII                  | 0.96%  | 0.02%  |
| Bacteria;Firmicutes;Erysipelotrichia;Erysipelotrichales;Erysipelotrichaceae;Coprobacillus                      | 0.51%  | 0.06%  |
| Bacteria;Firmicutes;Erysipelotrichia;Erysipelotrichales;Erysipelotrichaceae;Erysipelotrichaceae_incertae_sedis | 0.03%  | 0.27%  |
| Bacteria;Firmicutes;Erysipelotrichia;Erysipelotrichales;Erysipelotrichaceae;Holdemania                         | 0.00%  | 0.00%  |
| Bacteria;Firmicutes;Negativicutes;Selenomonadales;Acidaminococcaceae;Phascolarctobacterium                     | 0.00%  | 0.00%  |
| Bacteria;Firmicutes;Negativicutes;Selenomonadales;Veillonellaceae;Megasphaera                                  | 0.00%  | 0.00%  |
| Bacteria;Firmicutes;Negativicutes;Selenomonadales;Veillonellaceae;Propionispira                                | 0.00%  | 0.10%  |
| Bacteria;Firmicutes;Negativicutes;Selenomonadales;Veillonellaceae;Zymophilus                                   | 0.00%  | 0.01%  |
| Bacteria;Fusobacteria;Fusobacteria;Fusobacteriales;Fusobacteriaceae;Fusobacterium                              | 0.00%  | 0.00%  |
| Bacteria;Proteobacteria;Alphaproteobacteria;Caulobacteriales;Caulobacteraceae;Brevundimonas                    | 0.01%  | 0.00%  |
| Bacteria;Proteobacteria;Alphaproteobacteria;Rhizobiales;Hyphomicrobiaceae;Gemmiger                             | 0.00%  | 0.01%  |
| Bacteria;Proteobacteria;Alphaproteobacteria;Sphingomonadales;Sphingomonadaceae;Blastomonas                     | 0.00%  | 0.00%  |
| Bacteria;Proteobacteria;Betaproteobacteria;Burkholderiales;Comamonadaceae;Delftia                              | 0.00%  | 0.00%  |
| Bacteria;Proteobacteria;Gammaproteobacteria;Enterobacteriales;Enterobacteriaceae;Escherichia_Shigella          | 0.00%  | 0.00%  |
| Bacteria;Proteobacteria;Gammaproteobacteria;Pseudomonadales;Pseudomonadaceae;Pseudomonas                       | 0.00%  | 0.00%  |
| Bacteria;Proteobacteria;Gammaproteobacteria;Xanthomonadales;Xanthomonadaceae;Stenotrophomonas                  | 0.02%  | 0.00%  |
| Bacteria;Tenericutes;Mollicutes;Anaeroplasmatales;Anaeroplasmataceae;Anaeroplasma                              | 0.13%  | 0.05%  |



Supplemental Table 5. Intestinal taxa (OTUs) common to all animals within a treatment group.

| <b>Untreated</b>         | <b>Ampicillin</b>       |
|--------------------------|-------------------------|
| <i>Barnesiella</i>       | <i>Barnesiella</i>      |
| <i>Clostridium_XIVa</i>  | <i>Clostridium_XIVa</i> |
| <i>Acetivibrio</i>       | <i>Anaeroplasma</i>     |
| <i>Clostridium_XVIII</i> | <i>Enterococcus</i>     |
| <i>Coprococcus</i>       | <i>Lactobacillus</i>    |
| <i>Gracilibacter</i>     |                         |
| <i>Hespellia</i>         |                         |
| <i>Lachnospiracea</i>    |                         |
| <i>Roseburia</i>         |                         |
